# Supplementary material for: Establishment of an Autophagy‐Related Clinical Prognosis Model for Predicting the Overall Survival of Osteosarcoma
Source: Hindawi journal article supplement (doi:10.1155/2021/5428425), 2021-01-01

**A**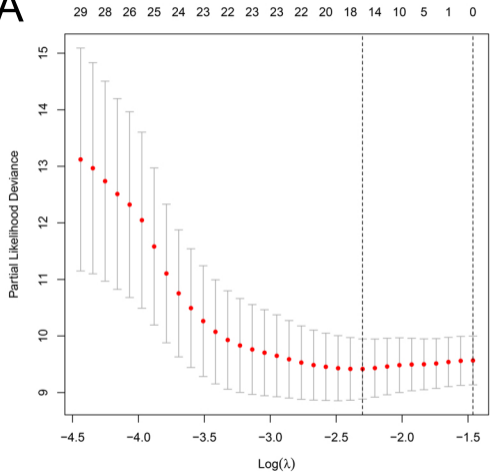**B**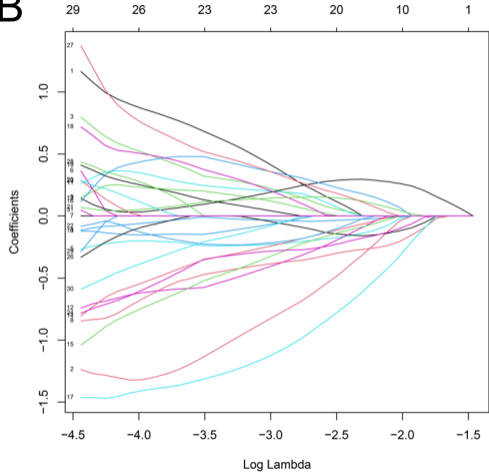

Supplement: f1 [file 5428425.f1.pdf]
