# Supplementary material for: Establishment of an Autophagy-Related Clinical Prognosis Model for Predicting the Overall Survival of Osteosarcoma
Source: Biomed Res Int. 2021 Sep 22;2021:5428425. doi: 10.1155/2021/5428425 (PMC8485141; doi:10.1155/2021/5428425)
Supplement: Supplementary 3 — Supplementary file 1: Univariate Cox regression screening for OS-related ARGs. [file 5428425.f3.txt]

id	futime	fustat	NKX2-3	BAK1	ATF4	CCL2	TP53INP2	ATG7	VMP1	ATG4A	EIF2AK3	CASP1	ATG9B	USP10	BNIP3	EGFR	MAPK1	BAG1	AMBRA1	MAP2K7	VEGFA	DLC1	MYC	PEX3	LAMP2	CALCOCO2	APOL1	VAMP3	SAR1A	FAS	ATG4D	WIPI1	DRAM1
TARGET-40-PALZGU	2882	1	0	4.27844574112702	7.04156607153519	2.37010846920765	3.79732431726998	1.56608449051547	3.61065282183807	1.97114805186031	2.16195215892674	2.24744147114441	0.512075148994836	3.53507004045055	3.65066117758354	1.09882376837969	4.422697226163	3.5910689904754	2.81483749838881	3.75572081858552	2.66436905866654	1.87393128588961	6.06539566886212	2.08569658067925	4.92726596630797	3.10243977915353	3.75581693951438	5.38743147530532	5.47091424609754	2.01374809056921	3.95803528235949	2.82289327031696	2.29068979759246
TARGET-40-PALHRL	4374	0	0	5.14620716120279	6.95553832317386	2.30830262097233	3.94598218599746	1.21200896011356	4.09403333498712	2.06035872310377	1.07066410077879	1.64749872061655	0.51075942155217	3.47208480035814	4.12174485538842	0.83745889932575	2.73623684914695	2.39840509977223	2.34024891524639	3.23693645626848	3.72408268549745	1.36692364897852	5.12304535311191	2.30623307050776	3.90057703259663	2.89629122671674	3.4174744961384	3.84779651832754	3.62884357062865	1.43349363984688	3.54957060578549	4.16429553680774	1.4529643632411
TARGET-40-0A4I0S	603	0	0.0233263318600275	4.32039080591706	6.48386413494679	4.00093744713925	3.12196030544978	2.13901100797225	5.26028540804038	1.97797591319913	2.27679440478926	2.34306665209895	0.399663303888018	3.39524106830853	2.9741621677966	1.94005396209696	3.85732417064791	2.86130034702039	2.45475496109782	3.14992592133071	4.03934899095001	2.68741907737189	4.11882482210861	2.0037461392329	5.04450778176291	3.31297005877052	4.26369548957408	5.46703814148436	3.91759406138693	3.55984663094498	2.66848224954133	3.30888505741176	3.19053584955525
TARGET-40-PARFTG	653	1	0	3.4931349223055	7.19060992217037	2.25144643155858	2.8425766307707	1.68688146043223	3.37125217020002	2.56069050180893	3.17536491377543	2.28637848203812	0.401193551063264	2.97654693984849	2.15062466137487	1.26645674413594	3.42049587636142	2.48931171598642	2.11079752341722	3.05467485703742	3.21963320643597	2.29066031181136	4.39294932220024	2.09180136921767	4.8942066100961	2.95598228477194	5.00490582947748	4.58777901620532	4.45845418960194	2.26405595306581	3.2867185397983	3.0075005166176	2.57395614106414
TARGET-40-0A4I8U	983	0	0.965987401824732	3.86553285684916	6.93879624433521	3.01061873477868	3.77338452645776	1.43456151187261	4.01088723140921	1.63389614591908	3.6169222421187	2.01671024793567	0.377623537635727	3.98501762959719	2.78270210672751	1.81237500056595	3.88934698478368	1.93266594814578	2.23731896557455	3.3391231289693	3.5837356884673	2.12901918572933	4.913856395935	2.40963532494993	3.95323729758789	3.04729408009402	2.97260075967378	4.43792680778819	4.03409243290651	2.04771286962962	2.17447033802826	3.12230827221127	2.11476679266551
TARGET-40-PAMRHD	74	1	0	4.02637515406648	7.3432896657104	1.72237858575832	3.21695145789656	1.58650055528142	4.62367960829401	2.4122395662634	3.40439907152209	1.94994573913024	0.374622206191208	3.70865076668708	3.33160490644351	1.13461524442511	3.45607016078131	2.54934881004412	2.26462650279957	3.35323859033755	4.22393991201816	2.56944248281634	5.28764959209501	2.4411912989402	5.05383684699202	3.14869011066367	2.23312111791982	4.62545169171541	3.95957543387163	0.897085496983489	2.66602938121304	3.58486631784563	1.73950250561039
TARGET-40-0A4I0Q	519	1	0	3.45622790420279	7.23011653209153	3.10616403410058	2.25290002870008	1.07956584981027	4.84145490317083	1.97103765983029	2.98039095606147	1.03308816933219	1.67491255290801	2.5850586771847	4.50997447429548	2.08382606434011	3.5259185231065	2.23097150805294	2.22410203210158	4.36366871406194	5.52681063203762	1.77433375817104	6.6428531681309	2.09203825662039	4.88668182747461	3.50454412457051	3.04992694282476	4.3192638640275	4.06948736159701	3.0149086960596	3.09604253054713	4.39868555550001	1.91161489172556
TARGET-40-PATEEM	1451	0	0	3.84229502332767	7.12372826609613	1.04026122306443	4.86714033320391	1.33204908374897	4.45543243867	3.51092395311885	3.43413445790934	3.1788739581698	0.765449879452697	4.03984903575416	2.89025211515707	2.632244946037	4.45750236406616	2.28211356780552	1.9141435165682	3.41333682218187	1.67991917497906	2.62262585392616	4.72332919732187	3.0585243118408	6.07295255631162	3.93252422632746	4.37082687511493	5.92402147617085	4.64547110403725	2.94001636400877	2.93621390100641	4.22844931328311	1.95356324723525
TARGET-40-0A4HX8	1750	0	0.0699770704115563	3.49932291498816	6.1845262775527	1.77782997700626	4.49071772959469	1.9604746414249	3.69304083788976	2.19191001792945	2.66725633667259	1.02318436924826	0.615604626359265	4.54817148970743	3.04124298223188	2.82236305515708	3.79240769354632	1.92116970465776	2.61145569658487	4.39515879314222	2.97436410893683	3.51390757622713	5.83195322383124	2.93913252674601	5.06563693157979	3.24675769699971	1.51308643113416	5.26907056026058	4.16241147095544	1.86568131433917	3.28469179410783	2.37370388590116	2.01099461607159
TARGET-40-0A4I0W	683	0	0.0214797274104514	3.42338992262821	5.84808206312395	1.43033880426815	3.66056358554518	1.59688744920086	5.12646908013849	1.92193136296064	2.36734310617138	1.16214557128867	0.60350172635638	3.63060350226779	3.57189519975459	3.27706231749661	4.00880955531959	1.88896724491549	2.13451667836177	2.82899708311485	4.82165919945657	2.80793188468912	5.2386302025209	1.76553474636298	5.41870269509202	2.97212281477679	2.65163726344562	4.83406394080497	4.03810251106495	2.54309989219543	1.85487336880684	2.69792946567933	1.63049866582627
TARGET-40-PASEFS	2112	0	0.0359053837421279	4.01783284999909	7.87133605379664	1.00863030514344	3.93096436678716	2.39212505061488	3.18806854103563	2.57315636049938	2.02931152478537	0.73352788747328	0.290896181188303	5.32998823640631	3.43134214836507	3.58251987497303	4.19709478391513	3.41688026648526	2.74228652795985	4.14214382640671	3.2247966261871	3.6277468988104	5.53365989840829	3.19602468708301	5.29821840245213	3.37467784318398	0.915941505980148	4.88989207754252	3.95620537619387	0.688762243878824	2.88455884950525	2.46165951713111	0.953302493409002
TARGET-40-PATMPU	1579	1	0.0136409106693863	4.2591594777781	7.29411801532922	0.239398041566555	3.79212653444303	1.77829269610546	3.40826349629543	2.14247879064225	3.72237858575832	1.90130136195475	0.550211157565391	4.10163326920436	5.22019063210777	0.188780697792142	4.43294604892685	3.68838180697903	2.34400467607764	3.39201511214607	5.54837496974439	0.740279982672883	4.94235967122165	2.34414674773333	4.2462484546224	2.74811769328557	2.44564725760306	5.37418051143793	5.02068887116071	0.269272578045014	3.12700588461232	3.05295489116577	1.24031432933371
TARGET-40-PARKAF	1061	1	0	3.80146910225368	7.33821312971029	0.714311467931997	3.96740842181373	1.73183491441663	3.79482132365135	1.78989614787257	3.49289146299196	1.02311338270356	0.582748670621304	2.85195887270737	3.76349656136532	2.3193867145441	4.03747886703297	2.66323074786037	2.582001940275	3.2813421683082	4.33396750436567	1.43130202799592	4.8084931715005	1.99833994598886	4.28807796985497	3.00010819807069	1.37812315306169	4.36537059609935	4.79473816221222	0.855591107710452	2.73339772928591	3.76419751229009	1.35456499895441
TARGET-40-PASKZZ	542	0	0	4.00878266921292	6.19158041582694	1.27464931016509	3.56940602488473	1.48748634934854	4.05079769382346	2.06928971271553	2.71417956438531	1.36002709321982	0.496104379770732	3.06277796123445	3.00636984264993	3.10282607211719	3.55815740696409	1.83207985267166	2.63094125676642	3.59267230419767	4.3709314674984	2.16385292195891	4.96656428324759	1.85814018028065	4.97860750791782	2.78289078063622	3.2513100817082	4.49761236561836	4.04674423427579	1.82260779406025	2.16636195744503	3.61124321439543	1.87184364850932
TARGET-40-0A4I5B	619	0	0.0963968041871571	4.33038629890637	6.87171676657308	3.06258802502102	4.50162384925615	1.79148070238627	4.51598361923258	2.02169291782153	3.65108614318645	2.56230348938545	0.583519083851487	3.97732572261552	2.55131913322916	1.98761192257843	3.83565126998913	2.81991337994622	2.69514754008037	4.04523326147366	2.76198729922979	2.74079806804147	4.22844931328311	2.36532859848522	4.50650673762788	3.37399614213124	5.13699521209583	4.82656374037371	4.68814678111998	2.27079802102428	3.59997233353952	3.65015565008512	2.6036441467689
TARGET-40-PAKXLD	2462	0	0	3.90115652517315	5.84391602775022	1.99620794626681	4.460768770546	1.22915720321487	4.38980081774267	2.18903382439002	2.63377992607442	0.712727828869701	0.143132155555768	2.76139166287834	4.07241454878126	2.27982783944088	2.82627390422066	1.92402385227801	2.80584961218117	4.37070135424473	4.50487458939846	2.0809645870866	6.63301990808064	2.84581117166484	5.26491169307446	3.4608735928112	1.92177906346554	5.04645177057841	3.98019899831021	2.45103962703046	3.24947568135652	4.37743613723517	1.96299314546038
TARGET-40-PANGRW	3378	0	0.0104934192484527	3.90837100270482	6.98644734350029	1.51308643113416	3.87563264119317	1.78416892050203	4.12189401655007	1.8951862702674	2.55613508299661	1.1525079483649	0.278341658621642	3.13561695066702	2.50138818814273	2.28889006122208	3.85411536793833	2.31301360854159	2.13330047622978	2.79792604972588	2.18659563546759	2.86637391403879	3.85264810358115	2.34027740476625	4.46469440254644	3.43988904761978	2.88838283448842	5.04721990677556	4.69237697964388	1.88639406639585	2.47881652904942	3.45263496727342	1.40718957187911
TARGET-40-PAMYYJ	271	1	0.0226163790673486	3.85223860029737	6.48836718426985	1.97434575181936	4.20837679152898	1.90715987355099	3.4727476930995	2.27497723944316	3.14973086369433	1.21598915414672	0.375623343928903	4.24284636403616	4.87231658575036	0.449957483628004	3.58279683350304	2.97667523887334	2.75058506790009	3.33965050533314	2.83015389378546	1.93315714269073	5.42999750825651	1.66202315700412	4.84597672161139	3.00602867174334	3.72531580955559	5.59941599360761	5.31205884127146	2.74142383973605	2.96857003435501	2.10070858859668	1.60984950003434
TARGET-40-PAUTWB	687	0	0	4.2841809601453	6.70860110981008	1.45649077158338	3.14531877455665	1.98371417198763	4.16063788011434	1.97394183612805	2.52732060787705	2.63812018808403	0.387803664533329	4.1135754912905	3.21046679530516	2.23143240844797	3.61092443242221	1.96904915749374	2.88045044378091	3.55890433684921	3.71063564155196	2.29287007479184	5.3496943477905	1.99902585203546	4.65171187813156	3.37463611564055	5.10487337672602	5.1153412647509	3.9018612607391	1.62727997698585	3.06262256073799	3.36656002073692	2.27190370626328
TARGET-40-0A4I42	619	1	0	3.25123432622271	7.89038893021673	1.06295060882281	3.97904671513356	1.35997088833675	4.15099826717708	1.97581358360401	3.69039474531998	1.92349150650953	0.413160775590814	4.01044866106382	5.3719665231742	0.60350172635638	3.86432483485003	1.98611963618422	2.36569253719753	3.37311919576823	5.82426888149535	1.66334461936608	5.2433263392606	2.2584586227179	4.71723223764599	3.22811063440518	2.98866651097212	4.496276983447	4.29204549249286	0.933346019147923	4.01560461145512	4.09350947136875	1.46383167953965
TARGET-40-PATUXZ	510	1	0.340505300673985	3.95709739706373	7.63851193857669	0.459221756822848	3.85793124616497	1.58803697187061	3.37424660035817	2.26252336083725	3.39844614547947	1.62671947124854	0.801075859167457	3.8059011898712	4.7573593382275	0.728399458671062	3.89629122671674	3.08482964282334	2.5166707684832	3.81026828344818	4.73981570648887	1.54483155194588	3.93902906358346	2.4922634045669	4.8769981739188	2.64323281085752	1.86016825286164	4.80038742573906	4.74061460075046	0.69421160776789	3.51275784218733	3.84249617711013	1.42841042535734
TARGET-40-PAUTYB	537	1	0.0426443374084937	4.32294483653186	7.2444761064418	2.17772648293207	2.96078969496992	1.09841955776554	3.21149508832153	1.6144742828377	2.63552224145975	2.17606740578593	0.21088754922081	3.5799524688313	3.19715770607627	0.294429602109328	2.90365533386949	2.4479758500933	2.14208662961753	3.75710861055239	3.33431083288471	1.2222481446184	4.71121955689433	1.25483588278576	3.80305133937798	2.07860983469637	4.35316094354561	4.22195439385221	4.23807603493212	0.295487943059753	3.37620702027526	3.81406841923543	2.05081510348395
TARGET-40-PAKFVX	922	0	0.0207688650945719	4.5076360935706	7.47507677425333	1.1584662951248	2.62262585392616	1.64071346483961	3.9383893083623	1.7935213781304	4.09944670461349	1.08549264216447	0.277032551874793	3.55712821445651	5.05576397663049	0.0350607969051143	2.81508351715437	3.12492362013382	3.44788330735355	2.94099359599338	3.18659563546759	1.12240767587279	3.97435493040729	1.88561340836382	3.56756978439936	2.71878902801998	3.87905876067441	5.22966866833777	4.97170908077801	1.42744526845165	3.27308316549322	4.26750583524376	1.26080853476227
TARGET-40-PANGPE	3378	0	0	3.35135977740708	6.48913506489104	2.30935083732328	3.84252634775862	1.65480212578979	4.36310097361619	2.32604831359602	3.35179791494717	1.45459705653455	0.323197108239328	4.12752598148229	3.51633038682594	2.70968765312004	4.31489950364382	2.37784561029697	2.62996271611785	2.74114335495532	2.28856527952821	1.95065503791869	4.03535117940316	2.46793154602629	5.66786374778669	3.60756704428153	3.8425162909459	4.80872997932522	4.47153865989197	2.0894981508391	2.15885402951662	3.75983759648808	1.36479652285873
TARGET-40-PANVJJ	3095	0	0	4.19035410862746	5.61653708163135	1.74725848592238	3.03467352930027	1.49333990881351	5.03733389706021	2.66140758035968	2.52406367577721	1.93508252331866	0.28936234047694	3.80459054480184	2.31019468031354	4.0596321598821	3.33179119099556	2.56749677290089	2.43605520602855	2.98192569929066	3.42188305086407	1.80512733083907	5.35909240252248	2.30649557225964	5.5431339269611	3.06338213742447	5.40895976048779	5.18453817889865	3.99004721957379	3.02596783571111	1.93967793711479	3.48292570648508	2.84553019494351
TARGET-40-PATPBS	1468	0	0.0291348040530228	4.34367785816497	6.43467325903347	1.70513746671902	3.73195435584769	1.61070006213476	4.42007137691729	2.27991696162368	3.41375653891978	1.46738383075773	0.331934470438814	3.66460798986892	3.45292483969571	2.44251891621732	4.53656894452397	2.57997659719256	2.86542397831313	3.35748162753371	3.53422349799458	2.11380049766581	4.39517250599578	2.65786862339084	5.07084868442445	3.25291516263213	3.47787157324577	5.52496006531838	4.21819219245811	2.52536733106569	2.86548336762414	3.84019128666182	1.6975959177064
TARGET-40-PAUVUL	347	1	0.0908534304511135	3.88115557333595	7.60345944258975	0.202762485275887	3.50953117023964	1.50512874161279	3.62236815241691	1.33193447043881	3.25389852784019	0.72106636873105	0.446150340129093	3.60734215119882	4.79516951012132	0.562865167656164	3.55301637830052	3.02699476578038	2.52837127796072	5.15311218967242	2.26894334936354	1.13112848574908	7.2249364692719	2.35968983107205	3.498952893396	2.88990180947033	2.88518386632035	4.09191981778108	4.481834943722	0.949273450026609	3.5955275301769	2.88430485905842	1.61041659714891
TARGET-40-PAKZZK	1515	1	0	4.13228070611293	6.59153281846044	1.32946807934977	4.34199286109195	1.8246456719606	3.69603834004748	2.21409371245226	2.95447551466621	2.53828982985849	0.780814009296801	3.25314215256419	2.3592962588922	1.65914821614934	3.46929992515639	2.70597790168252	2.10087675643202	3.42960257485848	2.79025073883523	2.35881820542763	4.60470592243872	2.13930576638392	4.92547729627676	3.14430746726304	3.56144834178548	5.52619717075039	4.75012945770184	1.80578771651903	2.43325325967086	3.02478064378296	2.21418698914376
TARGET-40-PASFCV	2062	0	0.0156402903768822	4.74341802395853	6.24757818709247	2.35225004643233	3.37252033884941	2.12379860846262	3.87442321325272	2.82871281223002	2.35574926935644	2.48287409133567	0.193330195384304	4.315414069845	2.5895477855556	3.17884209617837	4.14810435697644	2.45966767669431	2.81793018125281	3.26198205698432	2.76761242771675	1.94166975365654	4.27143314653259	2.02215472233225	5.42601309989885	2.72959627360631	6.03951130519172	5.28986028004186	4.23049508957216	2.59093729599798	2.12055101058253	4.4287520969847	3.05399753948633
TARGET-40-0A4HLD	3946	0	0.0460020465445205	3.75167794568758	6.13693576072911	2.73958891264427	4.49599569278678	1.95482909586847	5.72594560559958	3.11046347343868	2.19007750241059	0.489748433120335	1.3576646008127	3.93310047493137	5.42420324821763	2.95934358848011	4.38899540239513	2.69708432765871	3.49569516262407	3.40060623739089	5.6541433517644	3.14407900940678	5.0820212693455	2.52854631527383	4.10778828542807	3.80695297245063	3.56450011565451	5.35150819373415	4.03804103701151	2.56975841297	2.81239553875813	4.4885407160531	1.82195506470135
TARGET-40-PALKGN	2122	0	0	4.83556537648756	7.83136425367615	4.68887971147322	4.47968327286695	2.1171963291633	3.34204265715312	2.48949155669908	1.40337680668708	2.28924428515664	1.07491640205246	4.12920057487283	2.2523853805282	0.761200156099086	3.30038734018594	2.8672045950186	2.47186376840765	2.55478529039406	3.9828202127797	1.41835188778552	5.48102440549226	3.14352403252161	4.41656279353128	3.11938938022585	4.37081292889086	5.08936255282773	4.11818527623163	1.61461562421961	3.48819363161116	3.19507982439379	2.4428638966851
TARGET-40-PAMJXS	3862	1	0.0223323000980564	4.57487049819711	6.95860491249828	1.20857968576089	3.88573053400146	1.60994403170169	4.02569327368077	2.26945212566395	3.17547669675142	1.57937326706739	0.269033146455237	3.41924223212813	2.21902908547869	1.76850194743426	3.64913256397911	2.49423638248983	3.14465008622909	3.33586908921291	2.18972969362145	1.50243244740035	4.38180248316877	2.3623576669785	5.14283001106162	2.91578857281195	4.98477161238543	5.01900797314125	5.17168721868987	1.92675853198647	3.07736264877272	3.65275034344123	1.76790899523226
TARGET-40-PAMTCM	3002	0	0	3.45992991813192	7.2166478970886	1.45706891128218	2.68475142517232	0.832120371553323	4.20137509374498	1.72194131268466	2.77898649660629	1.14659005827019	0.744333347381359	3.47339729239044	4.39520678755945	3.32472421190928	3.5378551428742	2.73662652098894	3.12832639914664	3.12094906863	4.23764784248419	1.56598704075077	6.14083590445013	2.27444058908078	3.84681421347682	3.11002909279937	1.76684954547994	4.86103229973032	4.9413270188905	1.83826604662267	2.48225456546272	3.25071908340055	1.8144683915609
TARGET-40-PALECC	754	1	0	3.7941766970783	7.38591933098168	2.88141011877986	3.65830289815512	1.51712448580564	4.43905791588908	2.25649743456555	2.85596977044378	1.14260948729866	0.414243798718687	2.89334279347249	3.44298329378368	1.75172078677505	3.61049928018993	2.04788732939655	1.7648556712547	2.95633549692718	7.12986203974386	1.80475573100965	4.70766282538605	1.96676267714461	5.03198619903054	3.52209342350473	4.75237395577777	5.12929950479407	4.12915110736813	1.18966644665005	3.0768326955574	3.88057778433762	2.14786022273159
TARGET-40-0A4I48	1616	0	0.0673633671196102	4.53503270346132	6.54666299291799	2.77856605128561	4.75354570632368	2.08382606434011	4.36188764347457	2.18893890712028	2.67518362578781	1.87200131148318	0.417379975973023	3.96173444300974	3.04019107183829	1.96410285402304	3.75375427443557	2.06891152634578	2.67635768673286	3.80490025342809	3.49037758712129	2.2191530283517	5.92750539435694	3.13899463073902	5.4164682136136	2.7129918894618	3.08630822330885	5.49676911017047	3.68791171696721	0.784587736378888	3.4467987929614	3.25221883739374	2.31016559049428
TARGET-40-PARBGW	286	0	0.177854025259949	3.84432538879316	6.43583524998174	1.40037397764982	3.60179158386203	1.61419155852529	4.30313778384227	2.30249453283044	2.84364221842677	2.06822366067328	0.545276500131239	3.42135796692251	3.25541008977479	0.728051107820429	2.77448136032094	2.86963455581339	2.44630917185544	2.88066593660077	3.65377086812176	2.0622944380428	6.27598105941997	1.63477911090909	4.14324646400017	2.78205204099898	3.35165659479456	5.02452801797085	4.96957416742615	0.941331714437381	2.8880320745659	4.17266352124924	1.70500472169531
TARGET-40-0A4I4M	708	0	0	4.53826499413016	6.63457439248136	3.63360557875109	4.65446418364876	1.82993072183964	4.80987743182632	2.31805648189597	2.60143504887692	2.66083736769628	0.492929906667688	3.92504046703289	3.04036644350822	0.937043014451019	3.49689690783382	2.85489331082096	2.11313371003076	3.25448822539219	1.90919706299169	2.37239496523802	4.79739176529243	2.69401097182459	6.67259081808877	3.4794375327354	3.75460962302563	4.74305173192294	3.61182156479038	2.55075294086895	3.36967585815815	3.41615064996218	2.27741945706503
TARGET-40-PAMLKS	180	1	0.176322772640463	4.0493171042728	7.06682542302333	0.46194758214236	1.47555186690754	1.47009429264778	3.62702310555406	0.923187220710169	0.988702862343229	0.742092468081248	1.14064779315484	3.9458792129128	5.23376154278504	0.517124485805643	2.49965457781943	3.83961700749316	2.17242350809909	3.94076813966523	1.95002041858471	1.15367564979724	9.31317055826826	2.88334710833732	3.02713635395847	2.19067806561753	1.21809917437015	4.39892492579792	4.22041508995043	0.592732094867074	3.20801775489589	1.93512025020615	0.879313676310888
TARGET-40-PAVDTY	369	0	0	3.27250102132207	6.96475325499721	4.81429918603288	4.16921951139959	1.51540969338596	4.35983036654864	2.21483975717771	2.02250985600894	1.29136780428531	0.301353518877764	4.8889477683815	3.50436615061227	1.28089694244312	3.01067243810248	2.5568708015688	1.77205455193333	2.97674854747946	4.9290003281032	1.99584627791674	3.61554577615751	1.76081706626049	4.15855516012736	3.1734153039905	2.55657655916095	4.86851392389546	4.31566766171992	0.861717210507293	3.35357736380624	4.39363585562436	1.93338379147224
TARGET-40-PAPIJR	1719	0	0	4.21418698914376	7.21676913510398	4.48446041312882	3.22632355704852	1.73296378383329	5.28773453917509	1.86623542069621	2.68210131055645	2.04718936371245	0.738465217339776	3.23880214229262	3.32604831359602	1.89056342659829	3.81422226786837	2.75736467238549	2.70644214262643	3.62768854184588	4.65413189216314	1.88709629763567	5.53623322585021	2.17405481065709	4.68604663715673	2.98992010427869	4.42719046655492	4.74049047729294	3.79458222159218	1.59287558236442	2.89954302613288	3.53443518018184	2.25667857904838
TARGET-40-PATMXR	386	1	0	3.2704392383459	6.98456770521763	0.725523045529028	3.83850810278066	1.58438530725841	3.45405741883808	1.59741198755465	4.01126304276334	2.27575204882853	0.4368014735705	3.57878175865193	5.53363186837251	2.08837908591176	4.26156842411297	2.33822471998901	2.13477950623413	3.18699172563215	4.8289869315477	2.05398016818765	5.04585793054569	2.34445925613721	4.04944780566542	2.81655874938744	2.94172608582659	5.14868197682419	5.29280015083295	0.447949409916247	2.70283482221159	4.09942987203515	1.52556778890135
TARGET-40-PAUUML	672	0	0	4.1784118904078	5.78889708857611	0.303459301828336	4.27834909333534	1.2048293391035	3.44810804371056	1.65987890277362	3.73721083147858	0.435095151620097	0.335483255903486	3.72143828474878	4.22823379956007	2.78730708000927	4.07072420037255	2.77641987211068	2.38310981420896	4.84938883632662	5.64025072145402	2.15176142178513	6.25588024043164	1.63830557680709	4.32576776308295	2.78818454280828	0.612022162808062	4.99726982300387	3.59615993268286	1.06805164299779	2.95880556363946	4.4940635344892	0.637842060324105
TARGET-40-PANSEN	2256	0	0	3.71182525700246	5.65733417174498	1.47009429264778	4.15655032759782	2.42645262833452	4.05911296203546	2.49177615054225	2.72279387245362	1.53007074222508	0.717649008173315	3.64126856105303	3.38125568135433	3.93674157378112	4.03986657803892	1.81786880172799	2.82802220679368	3.6996959836412	3.32406170506551	2.23419472295381	4.44986506791841	1.98597396459092	6.05929470253664	3.51600253597791	2.87247419705121	4.98481261816752	4.47002919701227	3.22476576243901	2.36325519682662	3.86404744112458	2.02934686633434
TARGET-40-PAUXPZ	606	1	0.0299828662157143	3.79491487454078	5.78586175948703	0.390557635974131	3.45438649022886	1.12981053467684	3.28526904086555	1.36854487466153	3.43891823876904	1.06846445096691	0.271425676092934	3.07056106707866	4.03920859633713	1.6679829292988	2.69028298906351	2.36622428253138	2.57259867537003	4.44708984026918	3.64668110454186	1.36591645385806	3.85267806267286	1.3827779058392	4.32785260364678	3.45004989341804	3.67305885714924	4.37837983259119	4.82147552843701	1.58351908385149	3.00498670332244	3.24066541873663	1.73625850034403
TARGET-40-PASSLM	1865	0	0.016781550233402	4.58076657809053	6.42179891565468	1.54966917072649	3.62807365419614	0.861399611157438	4.76437269682084	2.86878552255535	2.95860143275255	0.779637944798667	2.27831191938371	4.03351110236132	5.80516345349566	1.53744517515163	3.85442460059767	2.19937396072182	2.75627609557993	3.85298760353004	4.89246388745938	2.95149454625829	5.49864978776841	2.78603171856782	3.93743855977148	3.29523812700833	3.53596583842982	5.10670007174168	4.32362226642943	1.45937915604558	3.07784114892689	3.10233899006303	1.69189144452501
TARGET-40-0A4I65	5840	0	0	4.09998524345099	6.17783011193233	1.86856824771804	4.6488508005187	1.51318752037086	4.20579911300607	1.68755345030925	2.535779259714	1.12987646083313	0.357608303813848	4.30370769847756	3.62273126400481	1.25187054870194	3.96406587748642	1.40457619045792	2.21778907075549	3.46948227768342	3.19205209860196	2.44511750745817	4.99972946931679	2.25326319925981	4.76540213962168	3.17445435841913	2.32322593648301	5.07637951664967	3.83029589432392	2.10731961708878	3.50731260441194	3.13290581201151	1.74987747027361
TARGET-40-PAVCLP	511	0	0	4.47868064885324	5.91400714139228	1.77521914463771	4.40722356908055	1.25362627842138	4.41674518015013	2.43895814789755	2.90594772681111	1.98844838350861	0.407842178211509	2.97120324470786	3.05705163470063	2.22900334364357	3.32145192695184	2.75785533056834	2.43373397997771	3.93104003525675	2.85800089423228	1.69291813080855	5.02674252741276	1.38449194441458	4.61240558140392	2.92694824794977	2.49689690783382	4.5187302546979	4.59797207930628	0.17555653643184	3.37378739372261	4.44714936544044	2.33439665224968
TARGET-40-PASUUH	1625	0	0.0817486512341679	4.3932102433881	6.83042647176882	3.76258268976612	3.43064657064744	1.76701910973141	3.92572414126785	1.89246874476495	2.12826040211823	2.68938862722166	0.228972569760161	3.70113870099797	4.38016838368543	1.26789530343837	3.33522597635918	2.59638657553006	2.53642596278788	5.27754592279775	3.10681730343136	1.28469179410783	3.95106552525219	2.03583502038752	4.82115404787585	3.06784519470997	4.54780145246108	4.62517695668051	4.38427089254241	0.990591872587583	5.09336157220785	3.38254275786869	2.77991104523023
TARGET-40-PAUYTT	579	0	0	3.52470311547277	6.2792614135664	0.860684756881905	4.7744550039017	1.67269688254088	3.64951199515137	4.55626999282486	2.35174138854729	0.77323681204236	0.121148056475311	3.02316662293954	2.94345253855882	3.02865754991996	3.3193722620851	2.87905876067441	2.05797006863733	4.6248787807419	4.02571098893705	2.567618456679	3.86958520709283	1.16761484075511	4.63353583392185	4.34173673991015	2.43175666019445	3.89607805539706	3.28832902872779	2.98810294756257	3.35902913089513	2.924213928172	1.08936255282773
TARGET-40-PANXSC	1217	0	0.017351841787775	4.08190200526052	7.21036645854409	2.46628777600976	3.92371017229318	1.90546643379942	4.35651711562079	1.68853846961694	2.71556395051172	2.64112980702158	0.422986450566717	2.67919857056692	3.26522683780226	2.24586070184035	3.4480022897858	2.88401173758352	3.24707683193082	3.19920118381294	2.37186548984017	1.85515253192325	3.99409089905118	2.01124514920427	5.43058636065219	3.21418698914376	4.8700095509354	4.41298470751484	4.40359495064166	1.93168305705981	2.99850242689463	2.80256547730794	2.08024833009212
TARGET-40-PATAWV	1702	0	0	3.48879776181526	7.32768377180344	0.586308388109527	3.29141201104716	2.12637821654025	5.02550725035524	2.10604674931283	3.23528284967284	1.03442703214237	0.0705267208766824	4.75047251876251	2.34894055994994	2.98763011166948	5.17739960424129	2.67525138605026	2.70911414847121	2.66845955691538	2.05644480101967	1.06853324081271	4.44857723324958	2.46725339170618	5.45479772394297	4.10700150541354	5.68776898075776	5.4949755541425	4.82273014794452	2.85205878164439	1.86955559705022	2.96264155972697	2.30190951019884
TARGET-40-PAMHLF	1913	0	0	4.62167681647878	6.42135965018918	1.78307942987361	3.93245808471422	1.54873253179192	3.76767598303101	2.22345344243161	3.23782372261925	1.85159914323515	0.293605910941713	3.12103198356768	1.77462894737121	2.58074849176377	4.29805706736207	2.08239603515389	2.71821913070233	3.80447696831164	2.55620867173959	2.35960550321452	4.90095855805325	2.77907057096875	4.9024257662127	3.55955299490352	3.96339088916765	5.03974816347716	4.45518910955336	1.73677803161906	2.58484227112478	3.90593810252423	2.30570792367212
TARGET-40-PARGTM	2610	0	0	4.1876885803085	6.32585589059551	0.568518597792544	3.87797977277066	1.92763101892366	4.57091218528312	2.59569460683892	3.67408772635756	1.54942274574666	0.390557635974131	4.12258989813231	4.36855884282752	3.1323629723653	4.60727112504662	2.15694666461436	2.27497723944316	3.2695269305774	3.07770445079071	1.36434830692009	3.9207410950874	2.65273887276965	5.48028128118261	3.58620028282573	2.86191567460193	5.18052981281072	5.51555161937666	2.88219305395633	2.79819571041252	3.80539564898017	1.59669666068723
TARGET-40-0A4I4O	627	1	0	4.29158145775344	7.50350457343698	4.4238134468868	3.1629994991933	1.71962155012405	4.46212432083564	2.08919303738922	2.90483088107087	1.33759692776637	2.28481022253023	3.49945048663897	5.26090636474831	2.87974496941923	3.89938834462999	2.33465407971883	2.93611965341265	2.97951322634008	8.39360711359011	2.1669724724107	4.56274918679876	1.73153083705416	5.49091985175496	3.39806300679061	2.62220413657709	4.68610828492317	4.26160603200216	1.26999063448832	2.93362928747764	3.21400042972961	2.17223146882548
TARGET-40-0A4HXS	2948	0	0.0134979917489773	4.33833883468481	6.93936529173638	5.21449009674798	3.7348938399431	1.00891709473605	3.51925253141971	1.72451931011215	3.20205719868407	2.94339627376167	0.198242681607614	4.2605601673076	3.64784405298789	1.34067619898311	3.4458193845257	1.91739356308998	2.87038444861146	3.68880699456639	2.36457243229586	1.75351896464138	6.58277726752625	2.06860202737867	5.45929390026491	3.65177501062106	4.470920751801	4.47857711249408	4.25494167493103	2.88686225853265	2.55183589748114	4.17766270753958	1.94575750797263
TARGET-40-PASNZV	1747	0	0.0133550586690676	4.32609147037152	7.03609226973997	2.12462590829198	3.27816321399783	1.89441035660098	4.0353247834093	2.5026870301607	3.9079193511918	2.84929875202777	0.193456365749585	4.19295161806985	2.39066768555967	0.438718676564791	4.18703924914499	3.26960173161235	2.95050574083518	3.32269252070408	2.65319762851025	1.69032769260495	5.50022524208703	2.60122108558495	4.83102089347239	3.36167011808516	4.05849833644658	4.4627787200562	4.98205352089358	1.3266523910044	2.95281811123186	3.6768428367283	2.36479652285873
TARGET-40-PAPKWD	422	1	2.60734215119882	3.85286778914111	6.78615459958514	0.248777693649712	3.99663279075588	1.3595211704276	3.43138226761853	1.82968722215566	2.81752093508571	0.87215895722894	1.38791392438595	5.28752031520152	4.74567835715677	0.778124451785633	3.84295872440025	2.9236816525487	2.28599397237378	3.05088474002509	2.93243918655347	1.22897256976016	7.19911576940271	2.57905943566079	4.29136780428531	2.83335565109672	1.79655622509593	4.98553686153785	5.13215318415036	0.483570740091555	3.35908537247869	3.66450559562751	1.10426955615925
TARGET-40-PASRNE	1707	0	0	4.05383250370322	6.41857452538899	2.16146851454998	3.99647913804195	1.79701297783615	4.89284756422207	2.41318786108004	3.59918685008725	2.22650852980868	0.259664183948652	4.05409307789041	3.58377178607507	0.620211026324114	4.06015981954948	3.11296696495818	2.71795602522302	3.86533488976239	4.54903454102949	3.1263121303287	4.79586563106399	2.54106872943091	5.14858843437402	3.13730677919329	2.48573594298921	5.28735777924113	4.68543562141132	0.903963766802978	3.33813912804328	3.79013602776643	2.15920936118998
TARGET-40-PASEBY	2049	0	0	3.818819891032	7.00478114008362	2.72165701409831	3.32847746877122	1.64348681256196	4.05004887960722	2.23627830293496	2.70004014726356	3.33761119880567	0.408494489469444	4.03382822078798	2.1525079483649	1.91460279075939	3.64045897434528	2.03562390973072	2.22468860017996	3.35208051372986	4.08620630087659	2.51800630566721	4.46581125447608	1.8811164085119	5.56079442277529	3.65655357382231	5.58983538029534	5.26160227125735	4.13814275832313	1.68611949332496	2.51116438858385	3.667858072231	2.86568131433917
TARGET-40-PAVECB	476	0	0.017351841787775	3.43197055519525	6.28221367115552	1.85770237883862	3.55625772881632	1.17491769523959	3.9564470196442	1.64929354696714	3.34096098451886	0.58014548442338	0.398569275594983	3.29764631479287	2.33759692776637	3.21133933345332	3.47149964194639	2.95971452322469	2.81768464748361	3.37901093127725	1.96473131018844	2.47040671081933	5.57888438464214	1.93587458085045	5.32029331688569	2.82946397800267	4.10597134691404	4.74225957675985	3.96365907302211	2.55090066464752	1.38863040809909	3.55506762419719	2.05966676642925
TARGET-40-PANZHX	1323	0	0	4.48793004875553	6.51185067464839	3.61225812477206	3.62382005074152	1.89056342659829	4.80811213820222	2.86959507697199	2.74474236302594	2.33267929424883	0.448689551768841	4.7282960507908	2.28557977040279	1.20701822594562	3.43693469501989	2.24394321571772	2.0621217119078	2.60843078122506	1.38000902920068	2.30082659253349	4.23322851438268	2.38482345872975	4.99504576433318	3.43116828537353	4.20150840397223	5.62939159408092	4.61121370050499	2.5544169458569	3.5743921982054	4.15850668898635	3.14419324285709
TARGET-40-0A4HMC	377	0	0	4.2997428613964	6.89992482509774	2.10929368902294	4.17580401136607	2.02683546246861	4.63596909660585	1.75522943379768	2.85197885504829	1.58486631784563	0.574149960509702	3.94416503612417	3.69821847822441	2.16677970612057	3.68891886521268	2.86548336762414	2.48018755571982	3.82296463055557	4.40945882607164	2.17149508137614	4.27597547422828	2.04043658620762	4.81153268284671	2.7973658241185	3.8606450323678	4.84276769023502	4.54656113568525	2.70968765312004	2.84454634525501	3.35246193429897	2.07347750967897
TARGET-40-0A4I6O	1906	1	0	3.16809642938357	6.53620680023066	2.14629678451923	3.78271258925868	1.58961968961547	4.8542201154559	2.78642908320306	3.08173161089162	0.796763857904443	1.29672169370439	3.11703005301019	5.54748684616071	5.60961609845547	2.94356506157059	2.43592190333681	2.15824006859716	3.77548254762629	5.85491574525737	2.08416633865672	5.13994829471978	2.55819415026373	6.85736771940487	3.31047100434602	4.5165258009287	4.51450734836689	4.20001776515122	3.1769769439588	2.19304627171222	4.2356045327633	1.77218126901038
TARGET-40-PALWWX	2163	0	0.0230423926658638	4.73712428189304	6.6527317035536	3.0889387268795	4.01483730113742	1.98484451074783	5.20264887906689	2.48073043250549	2.08437046472991	1.79784306706554	0.346985246742271	3.71550903985874	3.43442807108808	3.36303086670649	3.84114791090691	2.96738997597654	3.6710328938196	3.5559142942434	4.51012643290536	1.35946494583082	4.46645093214151	2.28670375634491	5.93109914848728	3.50803559770854	3.11840956485638	5.21300114895133	4.93684049094377	2.5935928058646	2.98755735392927	4.64067298071824	2.90093441386304
TARGET-40-PATMIF	1580	0	0	4.05693028838267	7.36223140705021	3.39205634005364	3.11286690866318	1.85347674237377	4.45734475993943	2.20404678826423	2.8888503817673	2.53679892889127	0.286408055460299	3.7965666074461	2.70509321973489	3.04484871525696	3.59398712685821	2.7691793088134	2.46871363587606	3.86027752874953	4.84679917300031	2.35140218362996	4.72797489485833	2.31243283680922	5.56148500136648	2.813668335991	3.73147653078029	4.47725637218212	4.34090403190883	1.68840418839746	2.64290947127027	4.12221714617112	2.86447341669465
TARGET-40-PAMHYN	3900	0	0.0150693217176482	3.25525900482865	7.74005731070654	1.80384697272215	3.2910141014173	1.59726895055261	3.64554027426848	2.48052364638826	2.81073099715075	2.72837768920695	0.251082803316987	3.92250234291858	2.4299908153707	2.46644440625049	3.63132550193202	1.9583972729785	2.9725088594896	3.24418684732971	3.56662034659192	2.45341222109807	4.87078883424145	1.59841284968358	4.42056324574045	3.78949973716302	5.6337130954241	4.45164632788395	1.48810363312358	1.86927920734301	2.68054940871888	4.38958746087603	2.04565264956989
TARGET-40-PAPWWC	2520	0	0.0109230271847919	4.18810811452378	7.47554295022674	1.0897015239627	3.4274989052224	2.24762375619625	4.07173693117134	2.98000701501461	2.05366744903883	2.25655781858703	0.150819598212133	3.62844699832474	1.78943713604028	0.748804690937068	3.64824683630807	2.16575118401426	2.82130203988953	2.20723693208428	2.28347734193776	2.72135078372278	4.22012870655685	1.90750601421266	4.90235823018194	3.70901486490327	4.27036448072262	5.72460934750349	5.15844609776989	2.21986549330741	3.41520430124989	4.75755668893945	1.76264646703815
TARGET-40-PATKSS	758	1	1.31817220300303	4.59577813791464	5.90039589342068	0.280956313831056	4.82918487422371	1.27011027582362	3.24366908096686	2.29578178892526	3.19910693314061	0.157690513582053	1.98637452608496	3.63076656603607	6.35673365891397	2.24382138448148	3.56893198791471	2.7158933705476	2.51313697663792	4.8124109422104	4.92954484764573	1.87326199537849	6.30451834287974	1.67978408906556	4.66765941371414	2.61228171884598	0.942833505069937	5.37999517145709	4.7704220746505	1.53171830997632	3.84151025548011	3.59257663397219	0.701859519009419
TARGET-40-PANMIG	776	1	0.0110662014062054	3.55487122392245	6.73544229613669	1.26038703742894	3.94831115813712	1.3015291182338	3.95672578872618	2.08494866514303	2.9000456265113	1.13066733981551	0.184216808092241	3.03662641033282	2.81637442783349	2.80477637795583	3.49915705497576	1.79601623990193	2.74271767870074	3.59800782246209	3.73535970249025	2.34644636150158	4.28921476981706	2.14499262384746	5.55780829893669	3.00906046815638	4.31620368068982	4.52422669712555	4.08644410868532	2.82505290233587	2.46654881696455	3.21110566961748	1.49743353443273
TARGET-40-PANPUM	295	1	0.408929199842869	3.72921557653782	6.82456039354553	1.09875640780814	3.65387402706694	1.42023984402628	3.89714359715496	2.30559119841136	3.37998131358038	0.766722359211393	0.491493980872165	3.09242734436089	3.31138685816204	2.83943560867389	3.41414906664556	2.45522857111714	2.84689442670347	4.75390399705134	3.06736336711961	2.06987398763198	6.35924881213676	2.38857530659843	4.60277160099223	3.51769143187326	1.82305637424759	4.53023932987318	5.07490356114655	2.56181489568308	3.48087258076991	3.99509552671158	1.40037397764982
TARGET-40-PALKDP	3282	0	0.0189189821630517	4.2813421683082	6.65305571653663	0.739156825713946	3.58368755691859	1.99772596403682	4.50016467949217	2.89116640141906	2.58589994786041	0.600935751825064	0.190045886894439	3.27103715991646	3.65793720178184	2.01324784956527	5.34570151768972	2.93945227507295	3.16596016191941	2.90714064107896	3.90552419743925	1.97203088414133	3.70905899177699	2.07983888066667	5.85343182837467	3.60346611905634	3.66950304845244	4.94304456905584	4.88404593815784	0.647913109543964	2.83436738712019	2.33722583118577	1.04718936371245
TARGET-40-PANZZJ	1538	0	0.0206266505899578	3.64160382821178	6.37590652593364	1.91475584967165	3.41804148712258	1.54769659131696	4.30367847756204	2.84743574936252	2.49426198783989	1.95824877499418	0.344374033285733	2.7602635346214	2.65715978906824	1.38631433116571	3.25389852784019	2.27869848166832	2.53089476129241	3.00075721614462	2.1104968819174	2.25879025249461	6.06640999293866	2.29422372340175	4.97778821220205	3.45115834944889	2.32785978754229	4.92077443595449	4.16576726031248	2.63733202013014	2.65729700999104	3.70205906649228	1.8552721567246
TARGET-40-PAMEKS	857	1	0.0280032784727525	3.88686225853265	5.85801084368171	1.06853324081271	3.1501697062957	1.25531944070579	4.71265080209197	2.47292961038627	3.07696947631511	0.708231388215503	0.115832298652565	3.81234419272945	3.39018615663465	2.82087333166205	3.25489633639012	2.2419011841795	2.35340798701574	3.82649764251687	3.14707871541124	2.48810363312358	5.55450597107125	2.78341474539886	6.00910974947906	2.9932395858742	1.44238620945346	5.10442053499518	4.1806332406501	3.8358331452309	2.49543934295128	3.08846389395355	2.50652577904312
TARGET-40-PALFYN	1003	1	0	4.19714197579326	6.59403640940522	4.77250329149543	3.74564609160395	2.40987967237033	4.6753417281165	2.68079692523967	2.12822740247183	2.52742070466755	0.684549469183843	3.15544162351987	2.67387296810997	2.1870709306172	3.86604744417808	2.61520439763918	2.69057353732565	2.92187425253406	2.65007520892099	2.0368197951977	3.7826182437361	2.08249822711716	5.2868035417156	3.62941490961077	5.78375783920442	5.26257221855237	4.23937512691442	2.37144734564191	2.74957717246	3.52945866592719	3.06460697529739
TARGET-40-PAPXGT	2526	0	0	3.75502642166398	6.69685488733284	2.87829374340104	3.95971452322469	2.10363191571534	4.12196030544978	3.32565984451088	3.14663893143308	3.47351418920632	0.260868738615679	4.12793862336349	4.00225245173138	1.63040547148232	3.68421281303289	2.33081651322948	2.28472140212484	3.37744307842486	2.13540353059765	1.51480398557177	3.90926427964524	2.37498380829719	6.26567129994659	3.90976350534031	7.6666138772951	5.67579335360842	4.63335564417225	0.921283979040922	2.99738274263174	4.4052912573225	2.62264927905367
TARGET-40-0A4HY5	290	1	0	4.23570408680418	6.94212034944091	2.56413424345824	2.87235599018986	0.973280639153119	5.61899328846117	1.60274191328239	2.7912097835233	1.73074862941621	0.761625692202483	3.902874318179	5.44062336956123	1.9467682836508	3.65507700338248	3.97641862941297	2.34911046201196	4.59722126840031	5.40886807661085	2.69812955745389	7.05091629297623	2.46800977409283	4.6092467150008	3.10126346807799	3.73737309795806	5.12662188328549	4.04616798046932	3.39577574255117	3.13326759166825	4.25587080116265	2.62065678410331
TARGET-40-PAUBIT	1029	0	0.0123541304078741	4.78470288943326	7.13829637826347	2.01289042833639	4.1659440877706	1.4751367775205	4.05252023187095	2.10624780311177	3.29815973723413	1.57148265796164	0.208392399790676	3.78057257426304	4.10065813442336	3.80709727493827	4.80184154948677	2.74413956264791	3.63947529361093	4.06308871201928	4.04374694735736	2.18596166492551	4.82902753738771	2.0818168105917	5.74198464575727	3.43590857239018	3.5100884447534	5.09536748284762	4.93188630580493	2.55704241526372	3.03061858584548	4.56876786189786	1.8770374506987
TARGET-40-PASYUK	1870	0	0	4.25606712524133	6.18582492850799	4.69693415266179	3.38078485047513	1.97100086060977	4.41698832644699	2.80022691659247	2.76130655189262	3.68954518057276	0.300650907642665	3.75786599519753	2.70192603790382	3.60724744888548	4.00046879971246	2.90604396614893	2.35120427725799	3.48129894154757	1.81856428347791	2.99640682521957	4.10374100577359	2.52177944057469	5.18115424507442	3.60689225983437	5.77219182826443	5.37215463535817	4.59944872542542	3.24903568496887	2.61475695175561	3.3875555490503	3.69819624854559
TARGET-40-PATJVI	1575	0	0	3.97859835634551	6.32470441312599	4.02772025835593	4.01000995735522	1.78039409630932	6.68428997033984	2.64871852522091	2.88692077186788	2.45328051263043	0.219710639548779	4.55927765682565	3.4075159119463	3.71284886264062	3.95735746595918	2.70077260935687	2.32952548519666	4.23118661322787	2.40454894280617	2.68066192149265	4.5119297188952	2.31817220300303	6.10950264867396	2.7370593662963	4.14000966780383	5.98737316949869	4.28042188335971	3.08601942438067	3.42034765265291	4.03305291931592	2.55934496654189
TARGET-40-PAPNVD	922	1	0.407407140125773	3.72700555031056	6.7944808511496	1.2498700468225	4.86370557906564	1.95921373878461	3.92785853746078	1.58683678625251	3.05064099742423	1.26363540356833	1.71329989907902	4.3711127430024	4.75257198958837	0.912649864897203	3.16480236519728	2.55603695883335	2.58969159009181	3.84179201613293	2.91527230364846	2.11938938022585	6.26855042135726	1.9484887165783	3.7115059195473	4.10144838048991	2.1339251405235	4.36115775128742	4.62954896659558	0.778797311374994	4.37435094512125	2.10584566749116	2.66800562942296
TARGET-40-0A4I9K	2257	0	0	4.2227427475942	6.32728675951518	1.37473347803121	3.82364747146746	1.83130977762207	3.56012797608126	2.2509312644955	3.70921342520711	1.53465928041388	0.320888980331776	3.61891989792362	1.7827440363952	1.66161280176004	3.79141818716404	1.81705015843252	2.26252336083725	3.26906307757713	2.79385427574731	2.66543825251416	3.41579922147275	2.47376094027275	5.8211923231279	3.77782997700626	1.9649530529008	5.27886942810769	4.19883200017144	2.10023761434574	2.37889998887171	4.8594080597025	1.25519856641969
TARGET-40-PARJXU	1631	1	0.0243196791954129	3.75220266136871	6.94936334015024	1.27500704749987	3.91488019808219	0.998700989820897	3.61680464676794	2.0348495729169	2.99220646773802	0.809825996097451	0.11609855223658	3.65959352235497	3.8754557150556	2.16217780416156	3.76313533247941	3.28855051498656	2.76487689719085	3.39878814763377	5.20034348354135	3.21280276576514	5.57054186420142	1.31851931064145	6.19370670240005	3.3459072748976	5.88425845212633	5.19456776527494	4.41357377405902	3.19531609808661	2.88015653805314	3.82145511910246	1.75454548946919
TARGET-40-PAVALD	551	0	0.356143810225275	3.56821455887951	6.30522454672174	0.360420466103209	4.33448961746791	1.35805861830549	3.87494447318788	2.02895806167088	3.51132887397535	0.147957881387101	1.3674269829773	3.72070529970778	4.50906872229459	2.79412469851132	3.76183841319502	1.92139824437324	2.73272505818609	4.65781718745822	3.33775390143501	1.40718957187911	6.19148171791314	2.97640029841916	3.56165606709526	3.87719454712624	0.760519037152996	4.58447550896037	4.23597973906982	2.15221587527131	2.80314435813232	4.19213102626319	1.51303588385945
TARGET-40-PARDAX	679	1	0.0254540964277491	3.72564301064583	7.07684979386132	0.399882010026675	2.92952591128508	1.35304093573761	3.46958646877992	2.75467375373121	4.039936745045	1.3469285314581	0.40805964807036	3.7111644806363	4.17090249685621	1.06025495075768	3.26259852586751	2.77856605128561	2.29416489551719	4.09525775775633	3.24730474223933	1.61249404814929	5.51204669643321	1.84233525632796	4.90882251286763	2.46876576012785	2.00784133967846	5.1833912315084	5.05268107107329	0.56120392076992	3.66986582518594	3.22099542247939	1.16394950405374
TARGET-40-0A4I3S	1844	0	0.0382956981815445	3.85890601326589	6.83066857925237	3.84597170522544	4.10868335356823	2.14241343787374	5.05414084472002	3.06028954236909	3.25223397847316	1.60007941179214	0.545573056035032	4.42265013763227	4.47863535261039	0.769940960414487	4.41879038359173	1.97922053105791	2.81432482450976	3.58749701189607	3.07932690541701	2.59017083504809	5.04272750007761	2.93555403851745	5.34302044576475	2.13937126007564	4.22169924596939	5.44665655530557	4.51455784411352	1.27220239470576	2.96611664331326	3.36157187006089	2.26225273429815
