# Supplementary material for: Establishment of an Autophagy-Related Clinical Prognosis Model for Predicting the Overall Survival of Osteosarcoma
Source: Biomed Res Int. 2021 Sep 22;2021:5428425. doi: 10.1155/2021/5428425 (PMC8485141; doi:10.1155/2021/5428425)
Supplement: Supplementary 4 — Supplementary file 2: The results of LASSO regression analysis. [file 5428425.f4.txt]

id	futime	fustat	BAK1	ATF4	CCL2	TP53INP2	VMP1	ATG4A	USP10	BNIP3	EGFR	MAPK1	BAG1	AMBRA1	MYC	PEX3	CALCOCO2	SAR1A
TARGET-40-PALZGU	2882	1	4.27844574112702	7.04156607153519	2.37010846920765	3.79732431726998	3.61065282183807	1.97114805186031	3.53507004045055	3.65066117758354	1.09882376837969	4.422697226163	3.5910689904754	2.81483749838881	6.06539566886212	2.08569658067925	3.10243977915353	5.47091424609754
TARGET-40-PALHRL	4374	0	5.14620716120279	6.95553832317386	2.30830262097233	3.94598218599746	4.09403333498712	2.06035872310377	3.47208480035814	4.12174485538842	0.83745889932575	2.73623684914695	2.39840509977223	2.34024891524639	5.12304535311191	2.30623307050776	2.89629122671674	3.62884357062865
TARGET-40-0A4I0S	603	0	4.32039080591706	6.48386413494679	4.00093744713925	3.12196030544978	5.26028540804038	1.97797591319913	3.39524106830853	2.9741621677966	1.94005396209696	3.85732417064791	2.86130034702039	2.45475496109782	4.11882482210861	2.0037461392329	3.31297005877052	3.91759406138693
TARGET-40-PARFTG	653	1	3.4931349223055	7.19060992217037	2.25144643155858	2.8425766307707	3.37125217020002	2.56069050180893	2.97654693984849	2.15062466137487	1.26645674413594	3.42049587636142	2.48931171598642	2.11079752341722	4.39294932220024	2.09180136921767	2.95598228477194	4.45845418960194
TARGET-40-0A4I8U	983	0	3.86553285684916	6.93879624433521	3.01061873477868	3.77338452645776	4.01088723140921	1.63389614591908	3.98501762959719	2.78270210672751	1.81237500056595	3.88934698478368	1.93266594814578	2.23731896557455	4.913856395935	2.40963532494993	3.04729408009402	4.03409243290651
TARGET-40-PAMRHD	74	1	4.02637515406648	7.3432896657104	1.72237858575832	3.21695145789656	4.62367960829401	2.4122395662634	3.70865076668708	3.33160490644351	1.13461524442511	3.45607016078131	2.54934881004412	2.26462650279957	5.28764959209501	2.4411912989402	3.14869011066367	3.95957543387163
TARGET-40-0A4I0Q	519	1	3.45622790420279	7.23011653209153	3.10616403410058	2.25290002870008	4.84145490317083	1.97103765983029	2.5850586771847	4.50997447429548	2.08382606434011	3.5259185231065	2.23097150805294	2.22410203210158	6.6428531681309	2.09203825662039	3.50454412457051	4.06948736159701
TARGET-40-PATEEM	1451	0	3.84229502332767	7.12372826609613	1.04026122306443	4.86714033320391	4.45543243867	3.51092395311885	4.03984903575416	2.89025211515707	2.632244946037	4.45750236406616	2.28211356780552	1.9141435165682	4.72332919732187	3.0585243118408	3.93252422632746	4.64547110403725
TARGET-40-0A4HX8	1750	0	3.49932291498816	6.1845262775527	1.77782997700626	4.49071772959469	3.69304083788976	2.19191001792945	4.54817148970743	3.04124298223188	2.82236305515708	3.79240769354632	1.92116970465776	2.61145569658487	5.83195322383124	2.93913252674601	3.24675769699971	4.16241147095544
TARGET-40-0A4I0W	683	0	3.42338992262821	5.84808206312395	1.43033880426815	3.66056358554518	5.12646908013849	1.92193136296064	3.63060350226779	3.57189519975459	3.27706231749661	4.00880955531959	1.88896724491549	2.13451667836177	5.2386302025209	1.76553474636298	2.97212281477679	4.03810251106495
TARGET-40-PASEFS	2112	0	4.01783284999909	7.87133605379664	1.00863030514344	3.93096436678716	3.18806854103563	2.57315636049938	5.32998823640631	3.43134214836507	3.58251987497303	4.19709478391513	3.41688026648526	2.74228652795985	5.53365989840829	3.19602468708301	3.37467784318398	3.95620537619387
TARGET-40-PATMPU	1579	1	4.2591594777781	7.29411801532922	0.239398041566555	3.79212653444303	3.40826349629543	2.14247879064225	4.10163326920436	5.22019063210777	0.188780697792142	4.43294604892685	3.68838180697903	2.34400467607764	4.94235967122165	2.34414674773333	2.74811769328557	5.02068887116071
TARGET-40-PARKAF	1061	1	3.80146910225368	7.33821312971029	0.714311467931997	3.96740842181373	3.79482132365135	1.78989614787257	2.85195887270737	3.76349656136532	2.3193867145441	4.03747886703297	2.66323074786037	2.582001940275	4.8084931715005	1.99833994598886	3.00010819807069	4.79473816221222
TARGET-40-PASKZZ	542	0	4.00878266921292	6.19158041582694	1.27464931016509	3.56940602488473	4.05079769382346	2.06928971271553	3.06277796123445	3.00636984264993	3.10282607211719	3.55815740696409	1.83207985267166	2.63094125676642	4.96656428324759	1.85814018028065	2.78289078063622	4.04674423427579
TARGET-40-0A4I5B	619	0	4.33038629890637	6.87171676657308	3.06258802502102	4.50162384925615	4.51598361923258	2.02169291782153	3.97732572261552	2.55131913322916	1.98761192257843	3.83565126998913	2.81991337994622	2.69514754008037	4.22844931328311	2.36532859848522	3.37399614213124	4.68814678111998
TARGET-40-PAKXLD	2462	0	3.90115652517315	5.84391602775022	1.99620794626681	4.460768770546	4.38980081774267	2.18903382439002	2.76139166287834	4.07241454878126	2.27982783944088	2.82627390422066	1.92402385227801	2.80584961218117	6.63301990808064	2.84581117166484	3.4608735928112	3.98019899831021
TARGET-40-PANGRW	3378	0	3.90837100270482	6.98644734350029	1.51308643113416	3.87563264119317	4.12189401655007	1.8951862702674	3.13561695066702	2.50138818814273	2.28889006122208	3.85411536793833	2.31301360854159	2.13330047622978	3.85264810358115	2.34027740476625	3.43988904761978	4.69237697964388
TARGET-40-PAMYYJ	271	1	3.85223860029737	6.48836718426985	1.97434575181936	4.20837679152898	3.4727476930995	2.27497723944316	4.24284636403616	4.87231658575036	0.449957483628004	3.58279683350304	2.97667523887334	2.75058506790009	5.42999750825651	1.66202315700412	3.00602867174334	5.31205884127146
TARGET-40-PAUTWB	687	0	4.2841809601453	6.70860110981008	1.45649077158338	3.14531877455665	4.16063788011434	1.97394183612805	4.1135754912905	3.21046679530516	2.23143240844797	3.61092443242221	1.96904915749374	2.88045044378091	5.3496943477905	1.99902585203546	3.37463611564055	3.9018612607391
TARGET-40-0A4I42	619	1	3.25123432622271	7.89038893021673	1.06295060882281	3.97904671513356	4.15099826717708	1.97581358360401	4.01044866106382	5.3719665231742	0.60350172635638	3.86432483485003	1.98611963618422	2.36569253719753	5.2433263392606	2.2584586227179	3.22811063440518	4.29204549249286
TARGET-40-PATUXZ	510	1	3.95709739706373	7.63851193857669	0.459221756822848	3.85793124616497	3.37424660035817	2.26252336083725	3.8059011898712	4.7573593382275	0.728399458671062	3.89629122671674	3.08482964282334	2.5166707684832	3.93902906358346	2.4922634045669	2.64323281085752	4.74061460075046
TARGET-40-PAUTYB	537	1	4.32294483653186	7.2444761064418	2.17772648293207	2.96078969496992	3.21149508832153	1.6144742828377	3.5799524688313	3.19715770607627	0.294429602109328	2.90365533386949	2.4479758500933	2.14208662961753	4.71121955689433	1.25483588278576	2.07860983469637	4.23807603493212
TARGET-40-PAKFVX	922	0	4.5076360935706	7.47507677425333	1.1584662951248	2.62262585392616	3.9383893083623	1.7935213781304	3.55712821445651	5.05576397663049	0.0350607969051143	2.81508351715437	3.12492362013382	3.44788330735355	3.97435493040729	1.88561340836382	2.71878902801998	4.97170908077801
TARGET-40-PANGPE	3378	0	3.35135977740708	6.48913506489104	2.30935083732328	3.84252634775862	4.36310097361619	2.32604831359602	4.12752598148229	3.51633038682594	2.70968765312004	4.31489950364382	2.37784561029697	2.62996271611785	4.03535117940316	2.46793154602629	3.60756704428153	4.47153865989197
TARGET-40-PANVJJ	3095	0	4.19035410862746	5.61653708163135	1.74725848592238	3.03467352930027	5.03733389706021	2.66140758035968	3.80459054480184	2.31019468031354	4.0596321598821	3.33179119099556	2.56749677290089	2.43605520602855	5.35909240252248	2.30649557225964	3.06338213742447	3.99004721957379
TARGET-40-PATPBS	1468	0	4.34367785816497	6.43467325903347	1.70513746671902	3.73195435584769	4.42007137691729	2.27991696162368	3.66460798986892	3.45292483969571	2.44251891621732	4.53656894452397	2.57997659719256	2.86542397831313	4.39517250599578	2.65786862339084	3.25291516263213	4.21819219245811
TARGET-40-PAUVUL	347	1	3.88115557333595	7.60345944258975	0.202762485275887	3.50953117023964	3.62236815241691	1.33193447043881	3.60734215119882	4.79516951012132	0.562865167656164	3.55301637830052	3.02699476578038	2.52837127796072	7.2249364692719	2.35968983107205	2.88990180947033	4.481834943722
TARGET-40-PAKZZK	1515	1	4.13228070611293	6.59153281846044	1.32946807934977	4.34199286109195	3.69603834004748	2.21409371245226	3.25314215256419	2.3592962588922	1.65914821614934	3.46929992515639	2.70597790168252	2.10087675643202	4.60470592243872	2.13930576638392	3.14430746726304	4.75012945770184
TARGET-40-PASFCV	2062	0	4.74341802395853	6.24757818709247	2.35225004643233	3.37252033884941	3.87442321325272	2.82871281223002	4.315414069845	2.5895477855556	3.17884209617837	4.14810435697644	2.45966767669431	2.81793018125281	4.27143314653259	2.02215472233225	2.72959627360631	4.23049508957216
TARGET-40-0A4HLD	3946	0	3.75167794568758	6.13693576072911	2.73958891264427	4.49599569278678	5.72594560559958	3.11046347343868	3.93310047493137	5.42420324821763	2.95934358848011	4.38899540239513	2.69708432765871	3.49569516262407	5.0820212693455	2.52854631527383	3.80695297245063	4.03804103701151
TARGET-40-PALKGN	2122	0	4.83556537648756	7.83136425367615	4.68887971147322	4.47968327286695	3.34204265715312	2.48949155669908	4.12920057487283	2.2523853805282	0.761200156099086	3.30038734018594	2.8672045950186	2.47186376840765	5.48102440549226	3.14352403252161	3.11938938022585	4.11818527623163
TARGET-40-PAMJXS	3862	1	4.57487049819711	6.95860491249828	1.20857968576089	3.88573053400146	4.02569327368077	2.26945212566395	3.41924223212813	2.21902908547869	1.76850194743426	3.64913256397911	2.49423638248983	3.14465008622909	4.38180248316877	2.3623576669785	2.91578857281195	5.17168721868987
TARGET-40-PAMTCM	3002	0	3.45992991813192	7.2166478970886	1.45706891128218	2.68475142517232	4.20137509374498	1.72194131268466	3.47339729239044	4.39520678755945	3.32472421190928	3.5378551428742	2.73662652098894	3.12832639914664	6.14083590445013	2.27444058908078	3.11002909279937	4.9413270188905
TARGET-40-PALECC	754	1	3.7941766970783	7.38591933098168	2.88141011877986	3.65830289815512	4.43905791588908	2.25649743456555	2.89334279347249	3.44298329378368	1.75172078677505	3.61049928018993	2.04788732939655	1.7648556712547	4.70766282538605	1.96676267714461	3.52209342350473	4.12915110736813
TARGET-40-0A4I48	1616	0	4.53503270346132	6.54666299291799	2.77856605128561	4.75354570632368	4.36188764347457	2.18893890712028	3.96173444300974	3.04019107183829	1.96410285402304	3.75375427443557	2.06891152634578	2.67635768673286	5.92750539435694	3.13899463073902	2.7129918894618	3.68791171696721
TARGET-40-PARBGW	286	0	3.84432538879316	6.43583524998174	1.40037397764982	3.60179158386203	4.30313778384227	2.30249453283044	3.42135796692251	3.25541008977479	0.728051107820429	2.77448136032094	2.86963455581339	2.44630917185544	6.27598105941997	1.63477911090909	2.78205204099898	4.96957416742615
TARGET-40-0A4I4M	708	0	4.53826499413016	6.63457439248136	3.63360557875109	4.65446418364876	4.80987743182632	2.31805648189597	3.92504046703289	3.04036644350822	0.937043014451019	3.49689690783382	2.85489331082096	2.11313371003076	4.79739176529243	2.69401097182459	3.4794375327354	3.61182156479038
TARGET-40-PAMLKS	180	1	4.0493171042728	7.06682542302333	0.46194758214236	1.47555186690754	3.62702310555406	0.923187220710169	3.9458792129128	5.23376154278504	0.517124485805643	2.49965457781943	3.83961700749316	2.17242350809909	9.31317055826826	2.88334710833732	2.19067806561753	4.22041508995043
TARGET-40-PAVDTY	369	0	3.27250102132207	6.96475325499721	4.81429918603288	4.16921951139959	4.35983036654864	2.21483975717771	4.8889477683815	3.50436615061227	1.28089694244312	3.01067243810248	2.5568708015688	1.77205455193333	3.61554577615751	1.76081706626049	3.1734153039905	4.31566766171992
TARGET-40-PAPIJR	1719	0	4.21418698914376	7.21676913510398	4.48446041312882	3.22632355704852	5.28773453917509	1.86623542069621	3.23880214229262	3.32604831359602	1.89056342659829	3.81422226786837	2.75736467238549	2.70644214262643	5.53623322585021	2.17405481065709	2.98992010427869	3.79458222159218
TARGET-40-PATMXR	386	1	3.2704392383459	6.98456770521763	0.725523045529028	3.83850810278066	3.45405741883808	1.59741198755465	3.57878175865193	5.53363186837251	2.08837908591176	4.26156842411297	2.33822471998901	2.13477950623413	5.04585793054569	2.34445925613721	2.81655874938744	5.29280015083295
TARGET-40-PAUUML	672	0	4.1784118904078	5.78889708857611	0.303459301828336	4.27834909333534	3.44810804371056	1.65987890277362	3.72143828474878	4.22823379956007	2.78730708000927	4.07072420037255	2.77641987211068	2.38310981420896	6.25588024043164	1.63830557680709	2.78818454280828	3.59615993268286
TARGET-40-PANSEN	2256	0	3.71182525700246	5.65733417174498	1.47009429264778	4.15655032759782	4.05911296203546	2.49177615054225	3.64126856105303	3.38125568135433	3.93674157378112	4.03986657803892	1.81786880172799	2.82802220679368	4.44986506791841	1.98597396459092	3.51600253597791	4.47002919701227
TARGET-40-PAUXPZ	606	1	3.79491487454078	5.78586175948703	0.390557635974131	3.45438649022886	3.28526904086555	1.36854487466153	3.07056106707866	4.03920859633713	1.6679829292988	2.69028298906351	2.36622428253138	2.57259867537003	3.85267806267286	1.3827779058392	3.45004989341804	4.82147552843701
TARGET-40-PASSLM	1865	0	4.58076657809053	6.42179891565468	1.54966917072649	3.62807365419614	4.76437269682084	2.86878552255535	4.03351110236132	5.80516345349566	1.53744517515163	3.85442460059767	2.19937396072182	2.75627609557993	5.49864978776841	2.78603171856782	3.29523812700833	4.32362226642943
TARGET-40-0A4I65	5840	0	4.09998524345099	6.17783011193233	1.86856824771804	4.6488508005187	4.20579911300607	1.68755345030925	4.30370769847756	3.62273126400481	1.25187054870194	3.96406587748642	1.40457619045792	2.21778907075549	4.99972946931679	2.25326319925981	3.17445435841913	3.83029589432392
TARGET-40-PAVCLP	511	0	4.47868064885324	5.91400714139228	1.77521914463771	4.40722356908055	4.41674518015013	2.43895814789755	2.97120324470786	3.05705163470063	2.22900334364357	3.32145192695184	2.75785533056834	2.43373397997771	5.02674252741276	1.38449194441458	2.92694824794977	4.59797207930628
TARGET-40-PASUUH	1625	0	4.3932102433881	6.83042647176882	3.76258268976612	3.43064657064744	3.92572414126785	1.89246874476495	3.70113870099797	4.38016838368543	1.26789530343837	3.33522597635918	2.59638657553006	2.53642596278788	3.95106552525219	2.03583502038752	3.06784519470997	4.38427089254241
TARGET-40-PAUYTT	579	0	3.52470311547277	6.2792614135664	0.860684756881905	4.7744550039017	3.64951199515137	4.55626999282486	3.02316662293954	2.94345253855882	3.02865754991996	3.3193722620851	2.87905876067441	2.05797006863733	3.86958520709283	1.16761484075511	4.34173673991015	3.28832902872779
TARGET-40-PANXSC	1217	0	4.08190200526052	7.21036645854409	2.46628777600976	3.92371017229318	4.35651711562079	1.68853846961694	2.67919857056692	3.26522683780226	2.24586070184035	3.4480022897858	2.88401173758352	3.24707683193082	3.99409089905118	2.01124514920427	3.21418698914376	4.40359495064166
TARGET-40-PATAWV	1702	0	3.48879776181526	7.32768377180344	0.586308388109527	3.29141201104716	5.02550725035524	2.10604674931283	4.75047251876251	2.34894055994994	2.98763011166948	5.17739960424129	2.67525138605026	2.70911414847121	4.44857723324958	2.46725339170618	4.10700150541354	4.82273014794452
TARGET-40-PAMHLF	1913	0	4.62167681647878	6.42135965018918	1.78307942987361	3.93245808471422	3.76767598303101	2.22345344243161	3.12103198356768	1.77462894737121	2.58074849176377	4.29805706736207	2.08239603515389	2.71821913070233	4.90095855805325	2.77907057096875	3.55955299490352	4.45518910955336
TARGET-40-PARGTM	2610	0	4.1876885803085	6.32585589059551	0.568518597792544	3.87797977277066	4.57091218528312	2.59569460683892	4.12258989813231	4.36855884282752	3.1323629723653	4.60727112504662	2.15694666461436	2.27497723944316	3.9207410950874	2.65273887276965	3.58620028282573	5.51555161937666
TARGET-40-0A4I4O	627	1	4.29158145775344	7.50350457343698	4.4238134468868	3.1629994991933	4.46212432083564	2.08919303738922	3.49945048663897	5.26090636474831	2.87974496941923	3.89938834462999	2.33465407971883	2.93611965341265	4.56274918679876	1.73153083705416	3.39806300679061	4.26160603200216
TARGET-40-0A4HXS	2948	0	4.33833883468481	6.93936529173638	5.21449009674798	3.7348938399431	3.51925253141971	1.72451931011215	4.2605601673076	3.64784405298789	1.34067619898311	3.4458193845257	1.91739356308998	2.87038444861146	6.58277726752625	2.06860202737867	3.65177501062106	4.25494167493103
TARGET-40-PASNZV	1747	0	4.32609147037152	7.03609226973997	2.12462590829198	3.27816321399783	4.0353247834093	2.5026870301607	4.19295161806985	2.39066768555967	0.438718676564791	4.18703924914499	3.26960173161235	2.95050574083518	5.50022524208703	2.60122108558495	3.36167011808516	4.98205352089358
TARGET-40-PAPKWD	422	1	3.85286778914111	6.78615459958514	0.248777693649712	3.99663279075588	3.43138226761853	1.82968722215566	5.28752031520152	4.74567835715677	0.778124451785633	3.84295872440025	2.9236816525487	2.28599397237378	7.19911576940271	2.57905943566079	2.83335565109672	5.13215318415036
TARGET-40-PASRNE	1707	0	4.05383250370322	6.41857452538899	2.16146851454998	3.99647913804195	4.89284756422207	2.41318786108004	4.05409307789041	3.58377178607507	0.620211026324114	4.06015981954948	3.11296696495818	2.71795602522302	4.79586563106399	2.54106872943091	3.13730677919329	4.68543562141132
TARGET-40-PASEBY	2049	0	3.818819891032	7.00478114008362	2.72165701409831	3.32847746877122	4.05004887960722	2.23627830293496	4.03382822078798	2.1525079483649	1.91460279075939	3.64045897434528	2.03562390973072	2.22468860017996	4.46581125447608	1.8811164085119	3.65655357382231	4.13814275832313
TARGET-40-PAVECB	476	0	3.43197055519525	6.28221367115552	1.85770237883862	3.55625772881632	3.9564470196442	1.64929354696714	3.29764631479287	2.33759692776637	3.21133933345332	3.47149964194639	2.95971452322469	2.81768464748361	5.57888438464214	1.93587458085045	2.82946397800267	3.96365907302211
TARGET-40-PANZHX	1323	0	4.48793004875553	6.51185067464839	3.61225812477206	3.62382005074152	4.80811213820222	2.86959507697199	4.7282960507908	2.28557977040279	1.20701822594562	3.43693469501989	2.24394321571772	2.0621217119078	4.23322851438268	2.38482345872975	3.43116828537353	4.61121370050499
TARGET-40-0A4HMC	377	0	4.2997428613964	6.89992482509774	2.10929368902294	4.17580401136607	4.63596909660585	1.75522943379768	3.94416503612417	3.69821847822441	2.16677970612057	3.68891886521268	2.86548336762414	2.48018755571982	4.27597547422828	2.04043658620762	2.7973658241185	4.54656113568525
TARGET-40-0A4I6O	1906	1	3.16809642938357	6.53620680023066	2.14629678451923	3.78271258925868	4.8542201154559	2.78642908320306	3.11703005301019	5.54748684616071	5.60961609845547	2.94356506157059	2.43592190333681	2.15824006859716	5.13994829471978	2.55819415026373	3.31047100434602	4.20001776515122
TARGET-40-PALWWX	2163	0	4.73712428189304	6.6527317035536	3.0889387268795	4.01483730113742	5.20264887906689	2.48073043250549	3.71550903985874	3.43442807108808	3.36303086670649	3.84114791090691	2.96738997597654	3.6710328938196	4.46645093214151	2.28670375634491	3.50803559770854	4.93684049094377
TARGET-40-PATMIF	1580	0	4.05693028838267	7.36223140705021	3.39205634005364	3.11286690866318	4.45734475993943	2.20404678826423	3.7965666074461	2.70509321973489	3.04484871525696	3.59398712685821	2.7691793088134	2.46871363587606	4.72797489485833	2.31243283680922	2.813668335991	4.34090403190883
TARGET-40-PAMHYN	3900	0	3.25525900482865	7.74005731070654	1.80384697272215	3.2910141014173	3.64554027426848	2.48052364638826	3.92250234291858	2.4299908153707	2.46644440625049	3.63132550193202	1.9583972729785	2.9725088594896	4.87078883424145	1.59841284968358	3.78949973716302	1.48810363312358
TARGET-40-PAPWWC	2520	0	4.18810811452378	7.47554295022674	1.0897015239627	3.4274989052224	4.07173693117134	2.98000701501461	3.62844699832474	1.78943713604028	0.748804690937068	3.64824683630807	2.16575118401426	2.82130203988953	4.22012870655685	1.90750601421266	3.70901486490327	5.15844609776989
TARGET-40-PATKSS	758	1	4.59577813791464	5.90039589342068	0.280956313831056	4.82918487422371	3.24366908096686	2.29578178892526	3.63076656603607	6.35673365891397	2.24382138448148	3.56893198791471	2.7158933705476	2.51313697663792	6.30451834287974	1.67978408906556	2.61228171884598	4.7704220746505
TARGET-40-PANMIG	776	1	3.55487122392245	6.73544229613669	1.26038703742894	3.94831115813712	3.95672578872618	2.08494866514303	3.03662641033282	2.81637442783349	2.80477637795583	3.49915705497576	1.79601623990193	2.74271767870074	4.28921476981706	2.14499262384746	3.00906046815638	4.08644410868532
TARGET-40-PANPUM	295	1	3.72921557653782	6.82456039354553	1.09875640780814	3.65387402706694	3.89714359715496	2.30559119841136	3.09242734436089	3.31138685816204	2.83943560867389	3.41414906664556	2.45522857111714	2.84689442670347	6.35924881213676	2.38857530659843	3.51769143187326	5.07490356114655
TARGET-40-PALKDP	3282	0	4.2813421683082	6.65305571653663	0.739156825713946	3.58368755691859	4.50016467949217	2.89116640141906	3.27103715991646	3.65793720178184	2.01324784956527	5.34570151768972	2.93945227507295	3.16596016191941	3.70905899177699	2.07983888066667	3.60346611905634	4.88404593815784
TARGET-40-PANZZJ	1538	0	3.64160382821178	6.37590652593364	1.91475584967165	3.41804148712258	4.30367847756204	2.84743574936252	2.7602635346214	2.65715978906824	1.38631433116571	3.25389852784019	2.27869848166832	2.53089476129241	6.06640999293866	2.29422372340175	3.45115834944889	4.16576726031248
TARGET-40-PAMEKS	857	1	3.88686225853265	5.85801084368171	1.06853324081271	3.1501697062957	4.71265080209197	2.47292961038627	3.81234419272945	3.39018615663465	2.82087333166205	3.25489633639012	2.2419011841795	2.35340798701574	5.55450597107125	2.78341474539886	2.9932395858742	4.1806332406501
TARGET-40-PALFYN	1003	1	4.19714197579326	6.59403640940522	4.77250329149543	3.74564609160395	4.6753417281165	2.68079692523967	3.15544162351987	2.67387296810997	2.1870709306172	3.86604744417808	2.61520439763918	2.69057353732565	3.7826182437361	2.08249822711716	3.62941490961077	4.23937512691442
TARGET-40-PAPXGT	2526	0	3.75502642166398	6.69685488733284	2.87829374340104	3.95971452322469	4.12196030544978	3.32565984451088	4.12793862336349	4.00225245173138	1.63040547148232	3.68421281303289	2.33081651322948	2.28472140212484	3.90926427964524	2.37498380829719	3.90976350534031	4.63335564417225
TARGET-40-0A4HY5	290	1	4.23570408680418	6.94212034944091	2.56413424345824	2.87235599018986	5.61899328846117	1.60274191328239	3.902874318179	5.44062336956123	1.9467682836508	3.65507700338248	3.97641862941297	2.34911046201196	7.05091629297623	2.46800977409283	3.10126346807799	4.04616798046932
TARGET-40-PAUBIT	1029	0	4.78470288943326	7.13829637826347	2.01289042833639	4.1659440877706	4.05252023187095	2.10624780311177	3.78057257426304	4.10065813442336	3.80709727493827	4.80184154948677	2.74413956264791	3.63947529361093	4.82902753738771	2.0818168105917	3.43590857239018	4.93188630580493
TARGET-40-PASYUK	1870	0	4.25606712524133	6.18582492850799	4.69693415266179	3.38078485047513	4.41698832644699	2.80022691659247	3.75786599519753	2.70192603790382	3.60724744888548	4.00046879971246	2.90604396614893	2.35120427725799	4.10374100577359	2.52177944057469	3.60689225983437	4.59944872542542
TARGET-40-PATJVI	1575	0	3.97859835634551	6.32470441312599	4.02772025835593	4.01000995735522	6.68428997033984	2.64871852522091	4.55927765682565	3.4075159119463	3.71284886264062	3.95735746595918	2.70077260935687	2.32952548519666	4.5119297188952	2.31817220300303	2.7370593662963	4.28042188335971
TARGET-40-PAPNVD	922	1	3.72700555031056	6.7944808511496	1.2498700468225	4.86370557906564	3.92785853746078	1.58683678625251	4.3711127430024	4.75257198958837	0.912649864897203	3.16480236519728	2.55603695883335	2.58969159009181	6.26855042135726	1.9484887165783	4.10144838048991	4.62954896659558
TARGET-40-0A4I9K	2257	0	4.2227427475942	6.32728675951518	1.37473347803121	3.82364747146746	3.56012797608126	2.2509312644955	3.61891989792362	1.7827440363952	1.66161280176004	3.79141818716404	1.81705015843252	2.26252336083725	3.41579922147275	2.47376094027275	3.77782997700626	4.19883200017144
TARGET-40-PARJXU	1631	1	3.75220266136871	6.94936334015024	1.27500704749987	3.91488019808219	3.61680464676794	2.0348495729169	3.65959352235497	3.8754557150556	2.16217780416156	3.76313533247941	3.28855051498656	2.76487689719085	5.57054186420142	1.31851931064145	3.3459072748976	4.41357377405902
TARGET-40-PAVALD	551	0	3.56821455887951	6.30522454672174	0.360420466103209	4.33448961746791	3.87494447318788	2.02895806167088	3.72070529970778	4.50906872229459	2.79412469851132	3.76183841319502	1.92139824437324	2.73272505818609	6.19148171791314	2.97640029841916	3.87719454712624	4.23597973906982
TARGET-40-PARDAX	679	1	3.72564301064583	7.07684979386132	0.399882010026675	2.92952591128508	3.46958646877992	2.75467375373121	3.7111644806363	4.17090249685621	1.06025495075768	3.26259852586751	2.77856605128561	2.29416489551719	5.51204669643321	1.84233525632796	2.46876576012785	5.05268107107329
TARGET-40-0A4I3S	1844	0	3.85890601326589	6.83066857925237	3.84597170522544	4.10868335356823	5.05414084472002	3.06028954236909	4.42265013763227	4.47863535261039	0.769940960414487	4.41879038359173	1.97922053105791	2.81432482450976	5.04272750007761	2.93555403851745	2.13937126007564	4.51455784411352
