# Supplementary material for: Establishment of an Autophagy-Related Clinical Prognosis Model for Predicting the Overall Survival of Osteosarcoma
Source: Biomed Res Int. 2021 Sep 22;2021:5428425. doi: 10.1155/2021/5428425 (PMC8485141; doi:10.1155/2021/5428425)
Supplement: Supplementary 5 — Supplementary file 3: The four OS- related ARGs successfully verified. [file 5428425.f5.txt]

id	futime	fustat	ATG4A	MAPK1	MYC
TARGET-40-PALZGU	2882	1	1.971148052	4.422697226	6.065395669
TARGET-40-PALHRL	4374	0	2.060358723	2.736236849	5.123045353
TARGET-40-0A4I0S	603	0	1.977975913	3.857324171	4.118824822
TARGET-40-PARFTG	653	1	2.560690502	3.420495876	4.392949322
TARGET-40-0A4I8U	983	0	1.633896146	3.889346985	4.913856396
TARGET-40-PAMRHD	74	1	2.412239566	3.456070161	5.287649592
TARGET-40-0A4I0Q	519	1	1.97103766	3.525918523	6.642853168
TARGET-40-PATEEM	1451	0	3.510923953	4.457502364	4.723329197
TARGET-40-0A4HX8	1750	0	2.191910018	3.792407694	5.831953224
TARGET-40-0A4I0W	683	0	1.921931363	4.008809555	5.238630203
TARGET-40-PASEFS	2112	0	2.57315636	4.197094784	5.533659898
TARGET-40-PATMPU	1579	1	2.142478791	4.432946049	4.942359671
TARGET-40-PARKAF	1061	1	1.789896148	4.037478867	4.808493172
TARGET-40-PASKZZ	542	0	2.069289713	3.558157407	4.966564283
TARGET-40-0A4I5B	619	0	2.021692918	3.83565127	4.228449313
TARGET-40-PAKXLD	2462	0	2.189033824	2.826273904	6.633019908
TARGET-40-PANGRW	3378	0	1.89518627	3.854115368	3.852648104
TARGET-40-PAMYYJ	271	1	2.274977239	3.582796834	5.429997508
TARGET-40-PAUTWB	687	0	1.973941836	3.610924432	5.349694348
TARGET-40-0A4I42	619	1	1.975813584	3.864324835	5.243326339
TARGET-40-PATUXZ	510	1	2.262523361	3.896291227	3.939029064
TARGET-40-PAUTYB	537	1	1.614474283	2.903655334	4.711219557
TARGET-40-PAKFVX	922	0	1.793521378	2.815083517	3.97435493
TARGET-40-PANGPE	3378	0	2.326048314	4.314899504	4.035351179
TARGET-40-PANVJJ	3095	0	2.66140758	3.331791191	5.359092403
TARGET-40-PATPBS	1468	0	2.279916962	4.536568945	4.395172506
TARGET-40-PAUVUL	347	1	1.33193447	3.553016378	7.224936469
TARGET-40-PAKZZK	1515	1	2.214093712	3.469299925	4.604705922
TARGET-40-PASFCV	2062	0	2.828712812	4.148104357	4.271433147
TARGET-40-0A4HLD	3946	0	3.110463473	4.388995402	5.082021269
TARGET-40-PALKGN	2122	0	2.489491557	3.30038734	5.481024405
TARGET-40-PAMJXS	3862	1	2.269452126	3.649132564	4.381802483
TARGET-40-PAMTCM	3002	0	1.721941313	3.537855143	6.140835904
TARGET-40-PALECC	754	1	2.256497435	3.61049928	4.707662825
TARGET-40-0A4I48	1616	0	2.188938907	3.753754274	5.927505394
TARGET-40-PARBGW	286	0	2.302494533	2.77448136	6.275981059
TARGET-40-0A4I4M	708	0	2.318056482	3.496896908	4.797391765
TARGET-40-PAMLKS	180	1	0.923187221	2.499654578	9.313170558
TARGET-40-PAVDTY	369	0	2.214839757	3.010672438	3.615545776
TARGET-40-PAPIJR	1719	0	1.866235421	3.814222268	5.536233226
TARGET-40-PATMXR	386	1	1.597411988	4.261568424	5.045857931
TARGET-40-PAUUML	672	0	1.659878903	4.0707242	6.25588024
TARGET-40-PANSEN	2256	0	2.491776151	4.039866578	4.449865068
TARGET-40-PAUXPZ	606	1	1.368544875	2.690282989	3.852678063
TARGET-40-PASSLM	1865	0	2.868785523	3.854424601	5.498649788
TARGET-40-0A4I65	5840	0	1.68755345	3.964065877	4.999729469
TARGET-40-PAVCLP	511	0	2.438958148	3.321451927	5.026742527
TARGET-40-PASUUH	1625	0	1.892468745	3.335225976	3.951065525
TARGET-40-PAUYTT	579	0	4.556269993	3.319372262	3.869585207
TARGET-40-PANXSC	1217	0	1.68853847	3.44800229	3.994090899
TARGET-40-PATAWV	1702	0	2.106046749	5.177399604	4.448577233
TARGET-40-PAMHLF	1913	0	2.223453442	4.298057067	4.900958558
TARGET-40-PARGTM	2610	0	2.595694607	4.607271125	3.920741095
TARGET-40-0A4I4O	627	1	2.089193037	3.899388345	4.562749187
TARGET-40-0A4HXS	2948	0	1.72451931	3.445819385	6.582777268
TARGET-40-PASNZV	1747	0	2.50268703	4.187039249	5.500225242
TARGET-40-PAPKWD	422	1	1.829687222	3.842958724	7.199115769
TARGET-40-PASRNE	1707	0	2.413187861	4.06015982	4.795865631
TARGET-40-PASEBY	2049	0	2.236278303	3.640458974	4.465811254
TARGET-40-PAVECB	476	0	1.649293547	3.471499642	5.578884385
TARGET-40-PANZHX	1323	0	2.869595077	3.436934695	4.233228514
TARGET-40-0A4HMC	377	0	1.755229434	3.688918865	4.275975474
TARGET-40-0A4I6O	1906	1	2.786429083	2.943565062	5.139948295
TARGET-40-PALWWX	2163	0	2.480730433	3.841147911	4.466450932
TARGET-40-PATMIF	1580	0	2.204046788	3.593987127	4.727974895
TARGET-40-PAMHYN	3900	0	2.480523646	3.631325502	4.870788834
TARGET-40-PAPWWC	2520	0	2.980007015	3.648246836	4.220128707
TARGET-40-PATKSS	758	1	2.295781789	3.568931988	6.304518343
TARGET-40-PANMIG	776	1	2.084948665	3.499157055	4.28921477
TARGET-40-PANPUM	295	1	2.305591198	3.414149067	6.359248812
TARGET-40-PALKDP	3282	0	2.891166401	5.345701518	3.709058992
TARGET-40-PANZZJ	1538	0	2.847435749	3.253898528	6.066409993
TARGET-40-PAMEKS	857	1	2.47292961	3.254896336	5.554505971
TARGET-40-PALFYN	1003	1	2.680796925	3.866047444	3.782618244
TARGET-40-PAPXGT	2526	0	3.325659845	3.684212813	3.90926428
TARGET-40-0A4HY5	290	1	1.602741913	3.655077003	7.050916293
TARGET-40-PAUBIT	1029	0	2.106247803	4.801841549	4.829027537
TARGET-40-PASYUK	1870	0	2.800226917	4.0004688	4.103741006
TARGET-40-PATJVI	1575	0	2.648718525	3.957357466	4.511929719
TARGET-40-PAPNVD	922	1	1.586836786	3.164802365	6.268550421
TARGET-40-0A4I9K	2257	0	2.250931264	3.791418187	3.415799221
TARGET-40-PARJXU	1631	1	2.034849573	3.763135332	5.570541864
TARGET-40-PAVALD	551	0	2.028958062	3.761838413	6.191481718
TARGET-40-PARDAX	679	1	2.754673754	3.262598526	5.512046696
TARGET-40-0A4I3S	1844	0	3.060289542	4.418790384	5.0427275
