# Supplementary material for: Establishment of an Autophagy-Related Clinical Prognosis Model for Predicting the Overall Survival of Osteosarcoma
Source: Biomed Res Int. 2021 Sep 22;2021:5428425. doi: 10.1155/2021/5428425 (PMC8485141; doi:10.1155/2021/5428425)
Supplement: Supplementary 6 — Supplementary file 4: Multivariate Cox regression analysis results. [file 5428425.f6.txt]

id	coef	HR	HR.95L	HR.95H	pvalue
ATG4A	-1.15497427130834	0.315065643025915	0.115302523042083	0.860920965095477	0.0243254965660282
MYC	0.478482723488192	1.61362422972573	1.06588755650777	2.44283098987373	0.0237250831068949
